# Supplementary material for: Impact of routine coronary catheterization in low extremity artery disease undergoing percutaneous transluminal angioplasty: study protocol for a multi-center randomized controlled trial
Source: Springer Nature journal article supplement (doi:10.1186/s13063-016-1237-0), 2016-02-29
Supplement: MOESM3 [file 9783098]

## Case Report Form of PIROUETTE-PTA Study (Screening and Randomization)

Mark : Yes : "v"、No : "—"、Not done: "ND"、Not applicable : "NA"  
Fill up every item.

Center ID: \_\_\_\_\_ Completion: Mandatory Date of form submission: \_\_\_\_\_

Patient ID: \_\_\_\_\_

Sex: \_\_\_\_\_ Age: \_\_\_\_\_ Time of Screening: \_\_\_\_\_

- A. Inclusion: > 20 y/o with LEAD documented by angiography\_\_\_\_(DSA\_\_\_\_ ; CTA\_\_\_\_; MRA\_\_\_\_) or sonography by operator\_\_\_\_\_
- B. Exclusion criteria: known CAD or unstable angina within past 3 months\_\_\_\_; acute myocardial infarction within past 6 months\_\_\_\_; known CAD status posterior PCI or bypass surgery within past 6 months\_\_\_\_; planning to do bypass surgery for known LEAD\_\_\_\_; pregnancy\_\_\_\_; documented active malignancy\_\_\_\_; needing emergency PTA\_\_\_\_; withdrawal of consent\_\_\_\_\_
- C. Grouping: routine\_\_\_\_(fill J-1); selective\_\_\_\_(fill J-2); registry\_\_\_\_\_
- D. Underlying: DM\_\_\_\_(type 1\_\_\_\_; type 2\_\_\_\_) for \_\_\_\_\_years ; insulin-used DM\_\_\_\_ ; HTN\_\_\_\_ ; HL\_\_\_\_ ; Smoking\_\_\_\_(quitted≥ 3yrs\_\_\_\_; quitted< \_\_\_\_\_3yrs\_\_\_\_; current\_\_\_\_) ; CAD\_\_\_\_ ; CAD S/P PCI\_\_\_\_ ; CAD S/P CABG\_\_\_\_ ; history of MI\_\_\_\_ ; history of CVA\_\_\_\_(ischemic\_\_\_\_ ; hemorrhagic\_\_\_\_ ; unidentified\_\_\_\_) ; S/P PTA\_\_\_\_; S/P bypass for LEAD\_\_\_\_ ; PUD\_\_\_\_ ; CKD\_\_\_\_(Stage\_\_\_\_) ; ESRD\_\_\_\_for\_\_\_\_years ; Non-ambulatory\_\_\_\_(totally bedridden\_\_\_\_ ; wheelchair bound\_\_\_\_) ;

Version: \_\_\_\_\_; Total pages:\_\_\_\_\_

CRF001(Version3.0; 2015.01.05) Confidential

anemia \_\_\_\_\_ ; CHF \_\_\_\_\_ (EF ≥ 40% \_\_\_\_\_ ; < 40% \_\_\_\_\_) ; others \_\_\_\_\_

E. ABI : Lt \_\_\_\_\_ ; Rt \_\_\_\_\_ ; # Fontaine class \_\_\_\_\_ ; Rutherford class \_\_\_\_\_

F. Symptoms/signs : No \_\_\_\_\_ ; Yes \_\_\_\_\_ (intermittent claudication \_\_\_\_\_ ; leg swelling \_\_\_\_\_ ; cold foot \_\_\_\_\_ ; gangrene \_\_\_\_\_ ; poor healing wound (ulcer) \_\_\_\_\_ ; minor tissue loss \_\_\_\_\_ ; major tissue loss \_\_\_\_\_ ; others \_\_\_\_\_)

G. Drugs used: Bokey \_\_\_\_\_ ; Plavix \_\_\_\_\_ ; Ticagrelor \_\_\_\_\_ ; Ticocid \_\_\_\_\_ ; Pletaal \_\_\_\_\_ ; Trental \_\_\_\_\_ ; Persantin \_\_\_\_\_ ; ACEI \_\_\_\_\_ ; ARB \_\_\_\_\_ ; DRI \_\_\_\_\_ ; CCB \_\_\_\_\_ ( ) ; Statin \_\_\_\_\_ ( ) ; Fibrate \_\_\_\_\_ ( ) ; TZD \_\_\_\_\_ ( ) ; DPP4i \_\_\_\_\_ ( ) ; GLP-1 \_\_\_\_\_ ( ) ; others \_\_\_\_\_ (specify \_\_\_\_\_)

H. Lab (on admission for cath or PTA as baseline lab data)

|      | Albumin | AC sugar | BUN | Cr     | Na | K   | GPT   | TC | TG | HDL                       | LDL | eGFR |
|------|---------|----------|-----|--------|----|-----|-------|----|----|---------------------------|-----|------|
| unit | g/dL    | mg/dL    |     | mmol/L |    | U/L | mg/dL |    |    | mL/min/1.73m <sup>2</sup> |     |      |
|      |         |          |     |        |    |     |       |    |    |                           |     |      |

| Hb   | WBC                 | PLT | N (Seg+Band) | L (lymphocytes) |
|------|---------------------|-----|--------------|-----------------|
| g/dL | 10 <sup>3</sup> /μl |     | %            |                 |
|      |                     |     |              |                 |

I

|  | BW (Kg) | BH (cm) | SBP (mmHg) | DBP (mmHg) | HR (/min) |
|--|---------|---------|------------|------------|-----------|
|  |         |         |            |            |           |

J.

1. Actually receiving coronary angiography: Yes\_\_\_\_; No\_\_\_\_(why, specify\_\_\_\_)

2. Actually receiving stress test: Yes\_\_\_\_; No\_\_\_\_(why, specify\_\_\_\_)

Signature: \_\_\_\_\_ Date: \_\_\_\_\_

## Case Report Form of PIROUETTE-PTA Study (Cath)

Mark : Yes : "v" 、 No : "—" 、 Not done: "ND" 、 Not applicable : "NA"

Fill up every item.

Center ID: \_\_\_\_\_ Completion: in case \_\_\_\_\_ Date of form submission: \_\_\_\_\_

Patient ID: \_\_\_\_\_

Sex: \_\_\_\_\_ Age: \_\_\_\_\_ Time of Screening: \_\_\_\_\_

A. Date of coronary angiography \_\_\_\_\_; Time elapsed from screening: \_\_\_\_\_  
days; Indications: routine \_\_\_\_\_; positive stress \_\_\_\_\_ (DSE \_\_\_\_\_; dTS \_\_\_\_\_;  
TXT \_\_\_\_\_); symptoms suggestive of angina \_\_\_\_\_ (stable \_\_\_\_\_; unstable \_\_\_\_\_;  
MI \_\_\_\_\_); EKG suggestive of CAD \_\_\_\_\_; cardiac enzymes suggestive of ACS \_\_\_\_\_;  
Holter suggestive of ischemia \_\_\_\_\_; cardiac echo suggestive of CAD \_\_\_\_\_; MSCTA  
suggestive of CAD \_\_\_\_\_

B. Results of coronary angiography: normal \_\_\_\_\_; non-obstructive atherosclerosis \_\_\_\_\_;  
CAD \_\_\_\_\_

C. If tick CAD in "B": LM \_\_\_\_\_; 4VD \_\_\_\_\_; 3VD \_\_\_\_\_; 2VD \_\_\_\_\_; 1VD \_\_\_\_\_; Syntax  
score \_\_\_\_\_

D. Vessels involved (if tick CAD in "B"): LM \_\_\_\_\_; LAD \_\_\_\_\_ ; LCX \_\_\_\_\_; RCA \_\_\_\_\_;  
IM \_\_\_\_\_; arterial graft \_\_\_\_\_ (LIMA \_\_\_\_\_ to which vessel \_\_\_\_\_; RIMA \_\_\_\_\_ to  
which vessel \_\_\_\_\_ ; others, specify \_\_\_\_\_ to which vessel \_\_\_\_\_); venous graft \_\_\_\_\_  
(SVG1 \_\_\_\_\_ to which vessel \_\_\_\_\_; SVG2 \_\_\_\_\_ to which vessel \_\_\_\_\_ ; SVG3 \_\_\_\_\_  
to which vessel \_\_\_\_\_ ; others, specify \_\_\_\_\_ to which vessel \_\_\_\_\_)

Version: \_\_\_\_\_; Total pages: \_\_\_\_\_

CRF002(2015.01.05; Version3.0) Confidential

E. Complications of coronary angiography: No\_\_\_\_; Yes\_\_\_\_(specify:\_\_\_\_\_)

F. Immediate outcomes of coronary angiography: No event\_\_\_\_; Events\_\_\_\_  
(non-fatal MI\_\_\_\_; non-fatal stroke\_\_\_\_; cardiovascular death\_\_\_\_ [fatal MI\_\_\_\_;  
fatal stroke\_\_\_\_] ; cardiogenic shock\_\_\_\_; sudden cardiac death\_\_\_\_] ; total  
death\_\_\_\_[specified \_\_\_\_\_])

G. Recommendation: Revascularization\_\_\_\_(PCI\_\_\_\_; CABG\_\_\_\_); Medical  
treatment \_\_\_\_\_

H. Final: Revascularization\_\_\_\_(PCI\_\_\_\_[fill form CRF003]; CABG\_\_\_\_[fill  
form CRF004]); Medical treatment \_\_\_\_\_)

I. Adjunct tools to facilitate confirmation of coronary severity: FFR\_\_\_\_ ; IVUS\_\_\_\_;  
OCT\_\_\_\_

Signature: \_\_\_\_\_ Date: \_\_\_\_\_

Version: \_\_\_\_\_; Total pages:\_\_\_\_\_

CRF002(2015.01.05; Version3.0) Confidential

## Case Report Form of PIROUETTE-PTA Study (PCI)

Mark : Yes : "v" 、 No : "—" 、 Not done: "ND" 、 Not applicable : "NA"

Fill up every item.

Center ID: \_\_\_\_\_ Completion: in case Date of form submission: \_\_\_\_\_

Patient ID: \_\_\_\_\_

Sex: \_\_\_\_\_ Age: \_\_\_\_\_ Time of Screening: \_\_\_\_\_

A. Date of PCI \_\_\_\_\_; Time elapsed from screening: \_\_\_\_\_ days

B. How many vessels are intervened?: LM \_\_\_\_\_; 4 \_\_\_\_\_; 3 \_\_\_\_\_; 2 \_\_\_\_\_; 1 \_\_\_\_\_

C. Which vessels are intervened?:

1. LM \_\_\_\_\_ (POBA \_\_\_\_\_; BMS \_\_\_\_\_ [Multi-Link \_\_\_\_\_; Integrity \_\_\_\_\_; others, specify \_\_\_\_\_];  
DES \_\_\_\_\_ [Xience Prime \_\_\_\_\_; Resolute Integrity \_\_\_\_\_; others, specify \_\_\_\_\_])
2. LAD \_\_\_\_\_ (POBA \_\_\_\_\_; BMS \_\_\_\_\_ [Multi-Link \_\_\_\_\_; Integrity \_\_\_\_\_; others,  
specify \_\_\_\_\_]; DES \_\_\_\_\_ [Xience Prime \_\_\_\_\_; Resolute Integrity \_\_\_\_\_; others,  
specify \_\_\_\_\_])
3. LCX \_\_\_\_\_ (POBA \_\_\_\_\_; BMS \_\_\_\_\_ [Multi-Link \_\_\_\_\_; Integrity \_\_\_\_\_; others,  
specify \_\_\_\_\_]; DES \_\_\_\_\_ [Xience Prime \_\_\_\_\_; Resolute Integrity \_\_\_\_\_; others,  
specify \_\_\_\_\_])
4. RCA \_\_\_\_\_ (POBA \_\_\_\_\_; BMS \_\_\_\_\_ [Multi-Link \_\_\_\_\_; Integrity \_\_\_\_\_; others,  
specify \_\_\_\_\_]; DES \_\_\_\_\_ [Xience Prime \_\_\_\_\_; Resolute Integrity \_\_\_\_\_; others,  
specify \_\_\_\_\_])
5. IM \_\_\_\_\_ (POBA \_\_\_\_\_; BMS \_\_\_\_\_ [Multi-Link \_\_\_\_\_; Integrity \_\_\_\_\_; others, specify \_\_\_\_\_];  
DES \_\_\_\_\_ [Xience Prime \_\_\_\_\_; Resolute Integrity \_\_\_\_\_; others, specify \_\_\_\_\_])

Version: \_\_\_\_\_; Total pages: \_\_\_\_\_

CRF003(2015.01.05; Version3.0) Confidential

6. Artery graft \_\_\_\_ (LIMA \_\_\_\_; RIMA \_\_\_\_; others, specify \_\_\_\_) (POBA \_\_\_\_; BMS \_\_\_\_ [Multi-Link \_\_\_\_; Integrity \_\_\_\_; others, specify \_\_\_\_]; DES \_\_\_\_ [Xience Prime \_\_\_\_; Resolute Integrity \_\_\_\_; others, specify \_\_\_\_])
7. Venous graft \_\_\_\_ (SVG1 \_\_\_\_; SVG2 \_\_\_\_; SVG3 \_\_\_\_; others, specify \_\_\_\_) (POBA \_\_\_\_; BMS \_\_\_\_ [Multi-Link \_\_\_\_; Integrity \_\_\_\_; others, specify \_\_\_\_]; DES \_\_\_\_ [Xience Prime \_\_\_\_; Resolute Integrity \_\_\_\_; others, specify \_\_\_\_])

D. How many lesions are intervened?: \_\_\_\_\_

E. How many stents are deployed? \_\_\_\_\_

F. Complications of PCI: No \_\_\_\_; Yes \_\_\_\_ (specify: \_\_\_\_\_)

G. Immediate outcomes of coronary angiography: No event \_\_\_\_; Events \_\_\_\_ (non-fatal MI \_\_\_\_; non-fatal stroke \_\_\_\_; cardiovascular death \_\_\_\_ [fatal MI \_\_\_\_; fatal stroke \_\_\_\_; cardiogenic shock \_\_\_\_; sudden cardiac death \_\_\_\_] ; total death \_\_\_\_ [specified \_\_\_\_\_])

H. Results of PCI: Success \_\_\_\_ (complete \_\_\_\_; partial \_\_\_\_); failure \_\_\_\_\_

I. Cross over to CABG: No \_\_\_\_; Yes \_\_\_\_ (fill form CRF004)

Signature: \_\_\_\_\_ Date: \_\_\_\_\_

Version: \_\_\_\_\_; Total pages: \_\_\_\_\_

CRF003(2015.01.05; Version3.0) Confidential

## Case Report Form of PIROUETTE-PTA Study (CABG)

Center ID: \_\_\_\_\_ Completion: in case Date of form submission: \_\_\_\_\_

Patient ID: \_\_\_\_\_

Sex: \_\_\_\_\_ Age: \_\_\_\_\_ Time of Screening: \_\_\_\_\_

A. Date of CABG \_\_\_\_\_; Time elapsed from screening: \_\_\_\_\_ days

B. Type: Elective \_\_\_\_\_; Urgency or Emergency \_\_\_\_\_

C. Beating heart \_\_\_\_\_; non-beating heart \_\_\_\_\_

D. How many vessels are bypassed?: 4 \_\_\_\_\_; 3 \_\_\_\_\_; 2 \_\_\_\_\_; 1 \_\_\_\_\_

E. Which vessels are bypassed?:

1. LAD \_\_\_(vein graft \_\_\_; artery graft \_\_\_)

2. LCX \_\_\_(vein graft \_\_\_; artery graft \_\_\_)

3. RCA \_\_\_(vein graft \_\_\_; artery graft \_\_\_)

4. IM \_\_\_(vein graft \_\_\_; artery graft \_\_\_)

F. How many grafts are implanted?: \_\_\_\_\_

G. Complications of CABG: No \_\_\_\_\_; Yes \_\_\_\_\_

H. Immediate outcomes of CABG: No event \_\_\_\_\_; Events \_\_\_\_\_(non-fatal MI \_\_\_\_\_;  
non-fatal stroke \_\_\_\_\_; cardiovascular death \_\_\_\_\_ [fatal MI \_\_\_\_\_; fatal stroke \_\_\_\_\_] ;

Current page: \_\_\_\_\_; Total pages: \_\_\_\_\_

CRF004 (2015.01.05; Version: 3.0) Confidential



cardiogenic shock\_\_\_\_; sudden cardiac death\_\_\_\_] ; total death\_\_\_\_  
[specified \_\_\_\_\_)]

I. Results of CABG: Success\_\_\_\_; failure \_\_\_\_\_

J. Cross over to PCI: No\_\_\_\_; Yes\_\_\_\_(fill form CRF003)

K. Duration of hospitalization:\_\_\_\_\_days

Signature: \_\_\_\_\_ Date: \_\_\_\_\_

## Case Report Form of PIROUETTE-PTA Study (PTA)

Mark : Yes : "v" 、 No : "—" 、 Not done: "ND" 、 Not applicable : "NA"

Fill up every item.

Center ID: \_\_\_\_\_ Completion: Mandatory Date of form submission: \_\_\_\_\_

Patient ID: \_\_\_\_\_

Sex: \_\_\_\_\_ Age: \_\_\_\_\_ Time of Screening: \_\_\_\_\_

A. Date of PTA \_\_\_\_\_; Time elapsed from screening: \_\_\_\_\_ days; Time elapsed from revascularization (PCI or CABG) \_\_\_\_\_ days; previous ipsilateral PTA \_\_\_\_\_; previous contralateral PTA \_\_\_\_\_; previous ipsilateral bypass \_\_\_\_\_; previous contralateral bypass \_\_\_\_\_

### B. Angiographic characteristics [TASC-II type sees J Vasc Surg 2007;45(supl S):S1-S67]

1. Rt lesions : Iliac \_\_\_\_\_ ( \_\_\_\_\_ % stenosis ; calcification \_\_\_\_\_ ; lesion length \_\_\_\_\_ mm ; reference vessel size \_\_\_\_\_ mm ; collateral \_\_\_\_\_ ; TASC-II type \_\_\_\_\_ ) ; Femopopliteal \_\_\_\_\_ ( \_\_\_\_\_ % stenosis ; calcification \_\_\_\_\_ ; lesion length \_\_\_\_\_ mm ; reference vessel size \_\_\_\_\_ mm ; collateral \_\_\_\_\_ ; TASC-II type \_\_\_\_\_ ) ; Infrapopliteal \_\_\_\_\_ ( \_\_\_\_\_ VD ; ATA \_\_\_\_\_ [ \_\_\_\_\_ % stenosis ; calcification \_\_\_\_\_ ; lesion length \_\_\_\_\_ mm ; reference vessel size \_\_\_\_\_ mm ; collateral \_\_\_\_\_ ] ; PTA \_\_\_\_\_ [ \_\_\_\_\_ % stenosis ; calcification \_\_\_\_\_ ; lesion length \_\_\_\_\_ mm ; reference vessel size \_\_\_\_\_ mm ; collateral \_\_\_\_\_ ] ; peroneal \_\_\_\_\_ [ \_\_\_\_\_ % stenosis ; calcification \_\_\_\_\_ ; lesion length \_\_\_\_\_ mm ; reference vessel size \_\_\_\_\_ mm ; collateral \_\_\_\_\_ ] ; number of tibial run-off \_\_\_\_\_ )

2. Lt lesions : Iliac \_\_\_\_\_ ( \_\_\_\_\_ % stenosis ; calcification \_\_\_\_\_ ; lesion length \_\_\_\_\_

Version: \_\_\_\_\_; Total pages: \_\_\_\_\_

CRF005(2015.01.05; Version3.0) Confidential

mm ; reference vessel size \_\_\_\_\_ mm ; collateral \_\_\_\_\_ ; TASC-II type \_\_\_\_\_) ;  
Femopopliteal \_\_\_\_\_ ( \_\_\_\_\_ % stenosis ; calcification \_\_\_\_\_ ; lesion length \_\_\_\_\_  
mm ; reference vessel size \_\_\_\_\_ mm ; collateral \_\_\_\_\_ ; TASC-II type \_\_\_\_\_) ;  
Infrapopliteal \_\_\_\_\_ ( \_\_\_\_\_ VD ; ATA \_\_\_\_\_ [ \_\_\_\_\_ % stenosis ;  
calcification \_\_\_\_\_ ; lesion length \_\_\_\_\_ mm ; reference vessel size \_\_\_\_\_ mm ;  
collateral \_\_\_\_\_ ] ; PTA \_\_\_\_\_ [ \_\_\_\_\_ % stenosis ; calcification \_\_\_\_\_ ; lesion length  
mm ; reference vessel size \_\_\_\_\_ mm ; collateral \_\_\_\_\_ ] ; peroneal \_\_\_\_\_ [ \_\_\_\_\_ %  
stenosis ; calcification \_\_\_\_\_ ; lesion length \_\_\_\_\_ mm ; reference vessel size \_\_\_\_\_  
mm ; collateral \_\_\_\_\_ ] ; number of tibial run-off \_\_\_\_\_)

3. Right digital circulation : Grade \_\_\_\_\_

Left digital circulation : Grade \_\_\_\_\_

(P.S. : Grade 0 : no digital circulation ; Grade 1 : circulating flow to less than 5 toes or  
inadequate flow to 5 toes ; Grade 2: adequate flow to 5 toes)

4. Classification of pedal arch :

Right : type 1 \_\_\_\_\_ ; type 2A \_\_\_\_\_ ; type 2B \_\_\_\_\_ ; type 3 \_\_\_\_\_

Left : type 1 \_\_\_\_\_ ; type 2A \_\_\_\_\_ ; type 2B \_\_\_\_\_ ; type 3 \_\_\_\_\_

(P.S. : type 1 : both dorsalis pedis and plantar arteries patent ; type 2A : only dorsalis  
pedis patent ; type 2B : only plantar artery patent ; type 3 : both dorsalis pedis and  
plantar arteries occluded)

### **C. Angioplasty parameters**

1. Approach methods :

a. Antegrade \_\_\_\_\_ : transfemoral \_\_\_\_\_ (contralateral antegrade \_\_\_\_\_ ; ipsilateral  
antegrade \_\_\_\_\_) ; transbrachial antegrade \_\_\_\_\_

b. Retrograde \_\_\_\_\_ : distal SFA \_\_\_\_\_ ; popliteal \_\_\_\_\_ ; distal PTA \_\_\_\_\_ ;

Version: \_\_\_\_\_ ; Total pages: \_\_\_\_\_

CRF005(2015.01.05; Version3.0) Confidential

dorsal pedis \_\_\_\_\_ ; others \_\_\_\_\_ [specify: \_\_\_\_\_])

2. Special devices used : laser \_\_\_\_\_; re-entry device \_\_\_\_\_ (off-road \_\_\_\_\_; outback \_\_\_\_\_; others \_\_\_\_\_ [specify \_\_\_\_\_]); rotablation \_\_\_\_\_ ; cutting balloon \_\_\_\_\_; distal embolism protection device \_\_\_\_\_ ; others \_\_\_\_\_ (specify: \_\_\_\_\_)

3. Methods for CTO lesions : subintimal tracking \_\_\_\_\_ ; Re-entry device \_\_\_\_\_ ; double-balloon technique \_\_\_\_\_; SAFARI technique \_\_\_\_\_ ; others \_\_\_\_\_ (specify: \_\_\_\_\_)

4. PTA for ilac \_\_\_\_\_ (Left \_\_\_\_\_ ; Right \_\_\_\_\_)

POBA \_\_\_\_\_ (size : \_\_\_\_\_ mm ; length : \_\_\_\_\_ mm ; Brand : \_\_\_\_\_) ;

DEB \_\_\_\_\_ (size : \_\_\_\_\_ mm ; length : \_\_\_\_\_ mm ; Brand : \_\_\_\_\_) ;

Stenting: Yes \_\_\_\_\_ (provisional \_\_\_\_\_; routine \_\_\_\_\_); No \_\_\_\_\_

BMS \_\_\_\_\_ (size : \_\_\_\_\_ mm ; length : \_\_\_\_\_ mm ; Self-expandable stent \_\_\_\_\_ ; balloon-expandable stent \_\_\_\_\_; Brand : \_\_\_\_\_)

DES \_\_\_\_\_ (size : \_\_\_\_\_ mm ; length : \_\_\_\_\_ mm ; Self-expandable stent \_\_\_\_\_ ; balloon-expandable stent \_\_\_\_\_; Brand : \_\_\_\_\_)

5. PTA for CFA or SFA \_\_\_\_\_ (Left \_\_\_\_\_ ; Right \_\_\_\_\_)

POBA \_\_\_\_\_ (size : \_\_\_\_\_ mm ; length : \_\_\_\_\_ mm ; Brand : \_\_\_\_\_) ;

DEB \_\_\_\_\_ (size : \_\_\_\_\_ mm ; length : \_\_\_\_\_ mm ; Brand : \_\_\_\_\_) ;

Stenting: Yes \_\_\_\_\_ (provisional \_\_\_\_\_; routine \_\_\_\_\_); No \_\_\_\_\_

BMS \_\_\_\_\_ (size : \_\_\_\_\_ mm ; length : \_\_\_\_\_ mm ; Self-expandable stent \_\_\_\_\_ ; balloon-expandable stent \_\_\_\_\_; Brand : \_\_\_\_\_)

DES \_\_\_\_\_ (size : \_\_\_\_\_ mm ; length : \_\_\_\_\_ mm ; Self-expandable stent \_\_\_\_\_ ; balloon-expandable stent \_\_\_\_\_; Brand : \_\_\_\_\_)

6. PTA for popliteal \_\_\_\_\_ (Left \_\_\_\_\_ ; Right \_\_\_\_\_)

Version: \_\_\_\_\_; Total pages: \_\_\_\_\_

POBA\_\_\_\_\_ (size : \_\_\_\_\_ mm ; length : \_\_\_\_\_ mm ; Brand : \_\_\_\_\_) ;

DEB\_\_\_\_\_ (size : \_\_\_\_\_ mm ; length : \_\_\_\_\_ mm ; Brand : \_\_\_\_\_) ;

Stenting: Yes\_\_\_\_\_ (provisional\_\_\_\_\_ ; routine\_\_\_\_\_); No\_\_\_\_\_

BMS\_\_\_\_\_ (size : \_\_\_\_\_ mm ; length : \_\_\_\_\_ mm ; Self-expandable  
stent\_\_\_\_\_ ; balloon-expandable stent\_\_\_\_\_ ; Brand : \_\_\_\_\_)

DES\_\_\_\_\_ (size : \_\_\_\_\_ mm ; length : \_\_\_\_\_ mm ; Self-expandable  
stent\_\_\_\_\_ ; balloon-expandable stent\_\_\_\_\_ ; Brand : \_\_\_\_\_)

7. PTA for infrapopliteal\_\_\_\_\_ (Left\_\_\_\_\_ ; Right\_\_\_\_\_)

(1) PTA for ATA\_\_\_\_\_ (Left\_\_\_\_\_ ; Right\_\_\_\_\_)

POBA\_\_\_\_\_ (size : \_\_\_\_\_ mm ; length : \_\_\_\_\_ mm ; Brand : \_\_\_\_\_) ;

DEB\_\_\_\_\_ (size : \_\_\_\_\_ mm ; length : \_\_\_\_\_ mm ; Brand : \_\_\_\_\_) ;

Stenting: Yes\_\_\_\_\_ (provisional\_\_\_\_\_ ; routine\_\_\_\_\_); No\_\_\_\_\_

BMS\_\_\_\_\_ (size : \_\_\_\_\_ mm ; length : \_\_\_\_\_ mm ; Self-expandable  
stent\_\_\_\_\_ ; balloon-expandable stent\_\_\_\_\_ ; Brand : \_\_\_\_\_)

DES\_\_\_\_\_ (size : \_\_\_\_\_ mm ; length : \_\_\_\_\_ mm ; Self-expandable  
stent\_\_\_\_\_ ; balloon-expandable stent\_\_\_\_\_ ; Brand : \_\_\_\_\_)

(2) PTA for PTA\_\_\_\_\_ (Left\_\_\_\_\_ ; Right\_\_\_\_\_)

POBA\_\_\_\_\_ (size : \_\_\_\_\_ mm ; length : \_\_\_\_\_ mm ; Brand : \_\_\_\_\_) ;

DEB\_\_\_\_\_ (size : \_\_\_\_\_ mm ; length : \_\_\_\_\_ mm ; Brand : \_\_\_\_\_) ;

Stenting: Yes\_\_\_\_\_ (provisional\_\_\_\_\_ ; routine\_\_\_\_\_); No\_\_\_\_\_

BMS\_\_\_\_\_ (size : \_\_\_\_\_ mm ; length : \_\_\_\_\_ mm ; Self-expandable  
stent\_\_\_\_\_ ; balloon-expandable stent\_\_\_\_\_ ; Brand : \_\_\_\_\_)

DES\_\_\_\_\_ (size : \_\_\_\_\_ mm ; length : \_\_\_\_\_ mm ; Self-expandable  
stent\_\_\_\_\_ ; balloon-expandable stent\_\_\_\_\_ ; Brand : \_\_\_\_\_)

(3) PTA for peroneal artery\_\_\_\_\_ (Left\_\_\_\_\_ ; Right\_\_\_\_\_)

Version: \_\_\_\_\_ ; Total pages: \_\_\_\_\_

POBA\_\_\_\_\_ (size : \_\_\_\_\_ mm ; length : \_\_\_\_\_ mm ; Brand : \_\_\_\_\_) ;

DEB\_\_\_\_\_ (size : \_\_\_\_\_ mm ; length : \_\_\_\_\_ mm ; Brand : \_\_\_\_\_) ;

Stenting: Yes \_\_\_\_\_ (provisional \_\_\_\_\_ ; routine \_\_\_\_\_) ; No \_\_\_\_\_

BMS\_\_\_\_\_ (size : \_\_\_\_\_ mm ; length : \_\_\_\_\_ mm ; Self-expandable  
stent \_\_\_\_\_ ; balloon-expandable stent \_\_\_\_\_ ; Brand : \_\_\_\_\_)

DES\_\_\_\_\_ (size : \_\_\_\_\_ mm ; length : \_\_\_\_\_ mm ; Self-expandable  
stent \_\_\_\_\_ ; balloon-expandable stent \_\_\_\_\_ ; Brand : \_\_\_\_\_)

8. For SFA lesion, combined inflow intervention (iliac or CFA) \_\_\_\_\_ ; combined  
outflow intervention (infrapopliteal) \_\_\_\_\_

9. Complications : residual dissection \_\_\_\_\_ ; thrombus formation \_\_\_\_\_ ;  
dislodged stent \_\_\_\_\_ ; migrating stent with resultant uncovered  
lesion \_\_\_\_\_ ; vessel rupture \_\_\_\_\_ ; vascular access complications \_\_\_\_\_ ;  
shock \_\_\_\_\_ ; distal embolism \_\_\_\_\_ ; acute occlusion \_\_\_\_\_ ; others \_\_\_\_\_  
[specify: \_\_\_\_\_]

10. Immediate outcome : complete success \_\_\_\_\_ ; partial success \_\_\_\_\_ ;  
failure \_\_\_\_\_

11. If tick “complete success” or “partial success” in question 10:

Angiosome success \_\_\_\_\_ ; boundary success \_\_\_\_\_

12. After PTA,

Right digital circulation : Grade \_\_\_\_\_

Left digital circulation : Grade \_\_\_\_\_

(P.S. : Grade 0 : no digital circulation ; Grade 1 : circulating flow to less than 5 toes  
or inadequate flow to 5 toes ; Grade 2: adequate flow to 5 toes)

13. After PTA, pedal arch classification :

Right : type 1 \_\_\_\_\_ ; type 2A \_\_\_\_\_ ; type 2B \_\_\_\_\_ ; type 3 \_\_\_\_\_

Version: \_\_\_\_\_ ; Total pages: \_\_\_\_\_

Left : type 1 \_\_\_\_ ; type 2A \_\_\_\_ ; type 2B \_\_\_\_ ; type 3 \_\_\_\_

(P.S. : type 1 : both dorsalis pedis and plantar arteries patent ; type 2A : only dorsalis pedis patent ; type 2B : only plantar artery patent ; type 3 : both dorsalis pedis and plantar arteries occluded)

14. After PTA, wound brush (if there is an unhealed wound before PTA) will be

Right : No \_\_\_\_; Yes \_\_\_\_

Left : No \_\_\_\_; Yes \_\_\_\_

15. Immediate CV outcomes of PTA: No event \_\_\_\_; Events \_\_\_\_ (non-fatal MI \_\_\_\_; non-fatal stroke \_\_\_\_; cardiovascular death \_\_\_\_ [fatal MI \_\_\_\_; fatal stroke \_\_\_\_; cardiogenic shock \_\_\_\_; sudden cardiac death \_\_\_\_] ; total death \_\_\_\_ [specified \_\_\_\_\_])

16. Cross over to bypass surgery: No \_\_\_\_; Yes \_\_\_\_ (why, specific \_\_\_\_\_)

17. Procedure time: \_\_\_\_ min; Fluoro time: \_\_\_\_ min; Contrast used: \_\_\_\_ ml

Signature: \_\_\_\_\_ Date: \_\_\_\_\_

## Case Report Form of PIROUETTE-PTA Study (Visit 1)

**Mark** : Yes : "v"、No : "—"、Not done: "ND"、Not applicable : "NA"

**Fill up every item.**

Center ID: \_\_\_\_\_ Completion: Mandatory Date of form submission: \_\_\_\_\_

Patient ID: \_\_\_\_\_

Sex: \_\_\_\_\_ Age: \_\_\_\_\_ Time of Screening: \_\_\_\_\_

A. ABI : Lt \_\_\_\_\_ ; Rt \_\_\_\_\_ ; # Fontaine class \_\_\_\_\_ ; Rutherford class \_\_\_\_\_

B. Symptoms/signs : No \_\_\_\_\_ ; Yes \_\_\_\_\_ (intermittent claudication \_\_\_\_\_ ; leg swelling \_\_\_\_\_ ; cold foot \_\_\_\_\_ ; gangrene \_\_\_\_\_ ; poor healing wound (ulcer) \_\_\_\_\_ ; minor tissue loss \_\_\_\_\_ ; major tissue loss \_\_\_\_\_ ; others \_\_\_\_\_)

C. Drugs used: Bokey \_\_\_\_\_ ; Plavix \_\_\_\_\_ ; Ticagrelor \_\_\_\_\_ ; Ticocid \_\_\_\_\_ ;  
 Pletaal \_\_\_\_\_ ; Trental \_\_\_\_\_ ; Persantin \_\_\_\_\_ ; ACEI \_\_\_\_\_ ; ARB \_\_\_\_\_ ; DRI \_\_\_\_\_ ;  
 CCB \_\_\_\_\_ ( \_\_\_\_\_ ) ; Statin \_\_\_\_\_ ( \_\_\_\_\_ ) ; Fibrate \_\_\_\_\_ ( \_\_\_\_\_ ) ; TZD \_\_\_\_\_  
 ( \_\_\_\_\_ ) ; DPP4i \_\_\_\_\_ ( \_\_\_\_\_ ) ; GLP-1 \_\_\_\_\_ ( \_\_\_\_\_ ) ; others  
 (specified \_\_\_\_\_)

D.

|              | Date of occurrence | Time elapse from Screening (days) | Is it planned staged PCI (or CABG) or PTA (or bypass) | Is it related to cath, PCI or CABG? |
|--------------|--------------------|-----------------------------------|-------------------------------------------------------|-------------------------------------|
| Symptom-free |                    |                                   | NA                                                    | NA                                  |
| Intermittent |                    |                                   | NA                                                    | NA                                  |

Version: \_\_\_\_\_ ; Total pages: \_\_\_\_\_

CRF006(2015.01.05; Version3.0) Confidential



|                          |  |  |    |                                                                                 |
|--------------------------|--|--|----|---------------------------------------------------------------------------------|
| claudication             |  |  |    |                                                                                 |
| Resting pain or numbness |  |  | NA | NA                                                                              |
| Ulcer wound              |  |  | NA | NA                                                                              |
| Gangrene                 |  |  | NA | NA                                                                              |
| Minor amputation         |  |  | NA | NA                                                                              |
| Major amputation         |  |  | NA | NA                                                                              |
| Total Death              |  |  | NA | No____; Yes_<br>(cath____;<br>PCI____;<br>CABG____)<br>Cause of death:<br>_____ |
| CV death                 |  |  | NA | No____; Yes_<br>(cath____;<br>PCI____;<br>CABG____)                             |
| Cardiogenic shock        |  |  | NA | No____; Yes_<br>(cath____;<br>PCI____;<br>CABG____)                             |
| Sudden cardiac death     |  |  | NA | No____; Yes_<br>(cath____;<br>PCI____;<br>CABG____)                             |
| Fatal stroke             |  |  | NA | No____; Yes_<br>(cath____;<br>PCI____;<br>CABG____)                             |
| Fatal MI                 |  |  | NA | No____; Yes_                                                                    |

|                                                     |  |  |                                                                                                                                                    |                                                     |
|-----------------------------------------------------|--|--|----------------------------------------------------------------------------------------------------------------------------------------------------|-----------------------------------------------------|
|                                                     |  |  |                                                                                                                                                    | (cath____;<br>PCI____;<br>CABG____)                 |
| Non-fatal MI                                        |  |  | NA                                                                                                                                                 | No____; Yes_<br>(cath____;<br>PCI____;<br>CABG____) |
| Non-fatal stroke                                    |  |  | NA                                                                                                                                                 | No____; Yes_<br>(cath____;<br>PCI____;<br>CABG____) |
| CHF<br>hospitalization                              |  |  | NA                                                                                                                                                 | No____; Yes_<br>(cath____;<br>PCI____;<br>CABG____) |
| New ESRD (in<br>pts with no<br>ESRD at<br>baseline) |  |  | NA                                                                                                                                                 | No____; Yes_<br>(cath____;<br>PCI____;<br>CABG____) |
| TLR (PAD)                                           |  |  | No____<br>(ischemia-driven____<br>[symptoms____];<br>based on images____<br>[duplex____;<br>ABI____;<br>CTA____;<br>MRA____;<br>DSA____]); Yes____ | NA                                                  |
| TVR (PAD)                                           |  |  | No____<br>(ischemia-driven____<br>[symptoms____];<br>based on images____<br>[duplex____;                                                           | NA                                                  |

|                                     |  |  |                                                                                                                                                    |    |
|-------------------------------------|--|--|----------------------------------------------------------------------------------------------------------------------------------------------------|----|
|                                     |  |  | ABI____;<br>CTA____;<br>MRA____;<br>DSA____)]; Yes____                                                                                             |    |
| TLR (CAD)                           |  |  | No____<br>(ischemia-driven____<br>[symptoms____;<br>stress test____]);<br>based on images____<br>[CTA____;<br>MRA____;<br>cath____]); Yes____      | NA |
| TVR (CAD)                           |  |  | No____<br>(ischemia-driven____<br>[symptoms____;<br>stress test____]);<br>based on images____<br>[CTA____;<br>MRA____;<br>cath____]); Yes____      | NA |
| Any<br>Revascularization<br>for PAD |  |  | No____<br>(ischemia-driven____<br>[symptoms____];<br>based on images____<br>[duplex____;<br>ABI____;<br>CTA____;<br>MRA____;<br>DSA____]); Yes____ | NA |
| Any<br>revascularization<br>for CAD |  |  | No____<br>(ischemia-driven____<br>[symptoms____;<br>stress test____]);                                                                             | NA |

|                  |  |  |                                                                      |    |
|------------------|--|--|----------------------------------------------------------------------|----|
|                  |  |  | based on images ____<br>[CTA____;<br>MRA____;<br>cath____]); Yes____ |    |
| Recurrent angina |  |  | NA                                                                   | NA |

Signature: \_\_\_\_\_ Date: \_\_\_\_\_

## Case Report Form of PIROUETTE-PTA Study (Visit 2)

**Mark** : Yes : "v" 、 No : "—" 、 Not done: "ND" 、 Not applicable : "NA"

**Fill up every item.**

Center ID: \_\_\_\_\_ Completion: Mandatory Date of form submission: \_\_\_\_\_

Patient ID: \_\_\_\_\_

Sex: \_\_\_\_\_ Age: \_\_\_\_\_ Time of Screening: \_\_\_\_\_

A. ABI : Lt \_\_\_\_\_ ; Rt \_\_\_\_\_ ; # Fontaine class \_\_\_\_\_ ; Rutherford class \_\_\_\_\_

B. Symptoms/signs : No \_\_\_\_\_ ; Yes \_\_\_\_\_ (intermittent claudication \_\_\_\_\_ ; leg swelling \_\_\_\_\_ ; cold foot \_\_\_\_\_ ; gangrene \_\_\_\_\_ ; poor healing wound (ulcer) \_\_\_\_\_ ; minor tissue loss \_\_\_\_\_ ; major tissue loss \_\_\_\_\_ ; others \_\_\_\_\_)

C. Drugs used: Bokey \_\_\_\_\_ ; Plavix \_\_\_\_\_ ; Ticagrelor \_\_\_\_\_ ; Ticocid \_\_\_\_\_ ;  
 Pletaal \_\_\_\_\_ ; Trental \_\_\_\_\_ ; Persantin \_\_\_\_\_ ; ACEI \_\_\_\_\_ ; ARB \_\_\_\_\_ ; DRI \_\_\_\_\_ ;  
 CCB \_\_\_\_\_ ( \_\_\_\_\_ ) ; Statin \_\_\_\_\_ ( \_\_\_\_\_ ) ; Fibrate \_\_\_\_\_ ( \_\_\_\_\_ ) ; TZD \_\_\_\_\_  
 ( \_\_\_\_\_ ) ; DPP4i \_\_\_\_\_ ( \_\_\_\_\_ ) ; GLP-1 \_\_\_\_\_ ( \_\_\_\_\_ ) ; others  
 (specified \_\_\_\_\_ )

D.

|              | Date of occurrence | Time elapse from Screening (days) | Is it planned staged PCI (or CABG) or PTA (or bypass) | Is it related to cath, PCI or CABG? |
|--------------|--------------------|-----------------------------------|-------------------------------------------------------|-------------------------------------|
| Symptom-free |                    |                                   | NA                                                    | NA                                  |
| Intermittent |                    |                                   | NA                                                    | NA                                  |

Version: \_\_\_\_\_ ; Total pages: \_\_\_\_\_

CRF007(2015.01.05; Version3.0) Confidential

|                          |  |  |    |                                                                                 |
|--------------------------|--|--|----|---------------------------------------------------------------------------------|
| claudication             |  |  |    |                                                                                 |
| Resting pain or numbness |  |  | NA | NA                                                                              |
| Ulcer wound              |  |  | NA | NA                                                                              |
| Gangrene                 |  |  | NA | NA                                                                              |
| Minor amputation         |  |  | NA | NA                                                                              |
| Major amputation         |  |  | NA | NA                                                                              |
| Total Death              |  |  | NA | No____; Yes_<br>(cath____;<br>PCI____;<br>CABG____)<br>Cause of death:<br>_____ |
| CV death                 |  |  | NA | No____; Yes_<br>(cath____;<br>PCI____;<br>CABG____)                             |
| Cardiogenic shock        |  |  | NA | No____; Yes_<br>(cath____;<br>PCI____;<br>CABG____)                             |
| Sudden cardiac death     |  |  | NA | No____; Yes_<br>(cath____;<br>PCI____;<br>CABG____)                             |
| Fatal stroke             |  |  | NA | No____; Yes_<br>(cath____;<br>PCI____;<br>CABG____)                             |
| Fatal MI                 |  |  | NA | No____; Yes_                                                                    |

|                                                     |  |  |                                                                                                                                                    |                                                     |
|-----------------------------------------------------|--|--|----------------------------------------------------------------------------------------------------------------------------------------------------|-----------------------------------------------------|
|                                                     |  |  |                                                                                                                                                    | (cath____;<br>PCI____;<br>CABG____)                 |
| Non-fatal MI                                        |  |  | NA                                                                                                                                                 | No____; Yes_<br>(cath____;<br>PCI____;<br>CABG____) |
| Non-fatal stroke                                    |  |  | NA                                                                                                                                                 | No____; Yes_<br>(cath____;<br>PCI____;<br>CABG____) |
| CHF<br>hospitalization                              |  |  | NA                                                                                                                                                 | No____; Yes_<br>(cath____;<br>PCI____;<br>CABG____) |
| New ESRD (in<br>pts with no<br>ESRD at<br>baseline) |  |  | NA                                                                                                                                                 | No____; Yes_<br>(cath____;<br>PCI____;<br>CABG____) |
| TLR (PAD)                                           |  |  | No____<br>(ischemia-driven____<br>[symptoms____];<br>based on images____<br>[duplex____;<br>ABI____;<br>CTA____;<br>MRA____;<br>DSA____]); Yes____ | NA                                                  |
| TVR (PAD)                                           |  |  | No____<br>(ischemia-driven____<br>[symptoms____];<br>based on images____<br>[duplex____;                                                           | NA                                                  |

|                                     |  |  |                                                                                                                                                    |    |
|-------------------------------------|--|--|----------------------------------------------------------------------------------------------------------------------------------------------------|----|
|                                     |  |  | ABI____;<br>CTA____;<br>MRA____;<br>DSA____)]; Yes____                                                                                             |    |
| TLR (CAD)                           |  |  | No____<br>(ischemia-driven____<br>[symptoms____;<br>stress test____]);<br>based on images____<br>[CTA____;<br>MRA____;<br>cath____]); Yes____      | NA |
| TVR (CAD)                           |  |  | No____<br>(ischemia-driven____<br>[symptoms____;<br>stress test____]);<br>based on images____<br>[CTA____;<br>MRA____;<br>cath____]); Yes____      | NA |
| Any<br>Revascularization<br>for PAD |  |  | No____<br>(ischemia-driven____<br>[symptoms____];<br>based on images____<br>[duplex____;<br>ABI____;<br>CTA____;<br>MRA____;<br>DSA____]); Yes____ | NA |
| Any<br>revascularization<br>for CAD |  |  | No____<br>(ischemia-driven____<br>[symptoms____;<br>stress test____]);                                                                             | NA |



|                  |  |  |                                                                      |    |
|------------------|--|--|----------------------------------------------------------------------|----|
|                  |  |  | based on images ____<br>[CTA____;<br>MRA____;<br>cath____]); Yes____ |    |
| Recurrent angina |  |  | NA                                                                   | NA |

Signature: \_\_\_\_\_ Date: \_\_\_\_\_

## Case Report Form of PIROUETTE-PTA Study (Visit 3)

**Mark** : Yes : "v" 、 No : "—" 、 Not done: "ND" 、 Not applicable : "NA"

**Fill up every item.**

Center ID: \_\_\_\_\_ Completion: Mandatory Date of form submission: \_\_\_\_\_

Patient ID: \_\_\_\_\_

Sex: \_\_\_\_\_ Age: \_\_\_\_\_ Time of Screening: \_\_\_\_\_

A. ABI : Lt \_\_\_\_\_ ; Rt \_\_\_\_\_ ; # Fontaine class \_\_\_\_\_ ; Rutherford class \_\_\_\_\_

B. Symptoms/signs : No \_\_\_\_\_ ; Yes \_\_\_\_\_ (intermittent claudication \_\_\_\_\_ ; leg swelling \_\_\_\_\_ ; cold foot \_\_\_\_\_ ; gangrene \_\_\_\_\_ ; poor healing wound (ulcer) \_\_\_\_\_ ; minor tissue loss \_\_\_\_\_ ; major tissue loss \_\_\_\_\_ ; others \_\_\_\_\_)

C. Drugs used: Bokey \_\_\_\_\_ ; Plavix \_\_\_\_\_ ; Ticagrelor \_\_\_\_\_ ; Ticocid \_\_\_\_\_ ;  
 Pletaal \_\_\_\_\_ ; Trental \_\_\_\_\_ ; Persantin \_\_\_\_\_ ; ACEI \_\_\_\_\_ ; ARB \_\_\_\_\_ ; DRI \_\_\_\_\_ ;  
 CCB \_\_\_\_\_ ( \_\_\_\_\_ ) ; Statin \_\_\_\_\_ ( \_\_\_\_\_ ) ; Fibrate \_\_\_\_\_ ( \_\_\_\_\_ ) ; TZD \_\_\_\_\_  
 ( \_\_\_\_\_ ) ; DPP4i \_\_\_\_\_ ( \_\_\_\_\_ ) ; GLP-1 \_\_\_\_\_ ( \_\_\_\_\_ ) ; others  
 (specified \_\_\_\_\_ )

D.

|              | Date of occurrence | Time elapse from Screening (days) | Is it planned staged PCI (or CABG) or PTA (or bypass) | Remarks |
|--------------|--------------------|-----------------------------------|-------------------------------------------------------|---------|
| Symptom-free |                    |                                   | NA                                                    |         |
| Intermittent |                    |                                   | NA                                                    |         |

Version: \_\_\_\_\_ ; Total pages: \_\_\_\_\_

CRF008(2015.01.05; Version3.0) Confidential

|                                            |  |  |                                                    |  |
|--------------------------------------------|--|--|----------------------------------------------------|--|
| claudication                               |  |  |                                                    |  |
| Resting pain or numbness                   |  |  | NA                                                 |  |
| Ulcer wound                                |  |  | NA                                                 |  |
| Gangrene                                   |  |  | NA                                                 |  |
| Minor amputation                           |  |  | NA                                                 |  |
| Major amputation                           |  |  | NA                                                 |  |
| Total Death                                |  |  | NA                                                 |  |
| CV death                                   |  |  | NA                                                 |  |
| Cardiogenic shock                          |  |  | NA                                                 |  |
| Sudden cardiac death                       |  |  | NA                                                 |  |
| Fatal stroke                               |  |  | NA                                                 |  |
| Fatal MI                                   |  |  | NA                                                 |  |
| Non-fatal MI                               |  |  | NA                                                 |  |
| Non-fatal stroke                           |  |  | NA                                                 |  |
| CHF hospitalization                        |  |  | NA                                                 |  |
| New ESRD (in pts with no ESRD at baseline) |  |  | NA                                                 |  |
| TLR (PAD)                                  |  |  | No____<br>(ischemia-driven____<br>[symptoms____]); |  |

|                                     |  |  |                                                                                                                                                 |  |
|-------------------------------------|--|--|-------------------------------------------------------------------------------------------------------------------------------------------------|--|
|                                     |  |  | based on images____<br>[duplex____;<br>ABI____; CTA____;<br>MRA____;<br>DSA____]); Yes____                                                      |  |
| TVR (PAD)                           |  |  | No____<br>(ischemia-driven____<br>[symptoms____];<br>based on images____<br>[duplex____;<br>ABI____; CTA____;<br>MRA____;<br>DSA____]); Yes____ |  |
| TLR (CAD)                           |  |  | No____<br>(ischemia-driven____<br>[symptoms____;<br>stress test____];<br>based on images____<br>[CTA____;<br>MRA____;<br>cath____]); Yes____    |  |
| TVR (CAD)                           |  |  | No____<br>(ischemia-driven____<br>[symptoms____;<br>stress test____];<br>based on images____<br>[CTA____;<br>MRA____;<br>cath____]); Yes____    |  |
| Any<br>Revascularization<br>for PAD |  |  | No____<br>(ischemia-driven____<br>[symptoms____];<br>based on images____                                                                        |  |

|                                     |  |  |                                                                                                                                               |  |
|-------------------------------------|--|--|-----------------------------------------------------------------------------------------------------------------------------------------------|--|
|                                     |  |  | [duplex____;<br>ABI____; CTA____;<br>MRA____;<br>DSA____]); Yes____                                                                           |  |
| Any<br>revascularization<br>for CAD |  |  | No____<br>(ischemia-driven____<br>[symptoms____;<br>stress test____]);<br>based on images____<br>[CTA____;<br>MRA____;<br>cath____]); Yes____ |  |
| Recurrent angina                    |  |  | NA                                                                                                                                            |  |

Signature: \_\_\_\_\_ Date: \_\_\_\_\_

## Case Report Form of PIROUETTE-PTA Study (Visit 4)

**Mark** : Yes : "v" 、 No : "—" 、 Not done: "ND" 、 Not applicable : "NA"

**Fill up every item.**

Center ID: \_\_\_\_\_ Completion: Mandatory Date of form submission: \_\_\_\_\_

Patient ID: \_\_\_\_\_

Sex: \_\_\_\_\_ Age: \_\_\_\_\_ Time of Screening: \_\_\_\_\_

A. ABI : Lt \_\_\_\_\_ ; Rt \_\_\_\_\_ ; # Fontaine class \_\_\_\_\_ ; Rutherford class \_\_\_\_\_

B. Symptoms/signs : No \_\_\_\_\_ ; Yes \_\_\_\_\_ (intermittent claudication \_\_\_\_\_ ; leg swelling \_\_\_\_\_ ; cold foot \_\_\_\_\_ ; gangrene \_\_\_\_\_ ; poor healing wound (ulcer) \_\_\_\_\_ ; minor tissue loss \_\_\_\_\_ ; major tissue loss \_\_\_\_\_ ; others \_\_\_\_\_)

C. Drugs used: Bokey \_\_\_\_\_ ; Plavix \_\_\_\_\_ ; Ticagrelor \_\_\_\_\_ ; Ticocid \_\_\_\_\_ ;  
 Pletaal \_\_\_\_\_ ; Trental \_\_\_\_\_ ; Persantin \_\_\_\_\_ ; ACEI \_\_\_\_\_ ; ARB \_\_\_\_\_ ; DRI \_\_\_\_\_ ;  
 CCB \_\_\_\_\_ ( \_\_\_\_\_ ) ; Statin \_\_\_\_\_ ( \_\_\_\_\_ ) ; Fibrate \_\_\_\_\_ ( \_\_\_\_\_ ) ; TZD \_\_\_\_\_  
 ( \_\_\_\_\_ ) ; DPP4i \_\_\_\_\_ ( \_\_\_\_\_ ) ; GLP-1 \_\_\_\_\_ ( \_\_\_\_\_ ) ; others  
 (specified \_\_\_\_\_ )

D.

|              | Date of occurrence | Time elapse from Screening (days) | Is it planned staged PCI (or CABG) or PTA (or bypass) | Remarks |
|--------------|--------------------|-----------------------------------|-------------------------------------------------------|---------|
| Symptom-free |                    |                                   | NA                                                    |         |
| Intermittent |                    |                                   | NA                                                    |         |

Version: \_\_\_\_\_ ; Total pages: \_\_\_\_\_

CRF009(2015.01.05; Version3.0) Confidential

|                                            |  |  |                                                    |  |
|--------------------------------------------|--|--|----------------------------------------------------|--|
| claudication                               |  |  |                                                    |  |
| Resting pain or numbness                   |  |  | NA                                                 |  |
| Ulcer wound                                |  |  | NA                                                 |  |
| Gangrene                                   |  |  | NA                                                 |  |
| Minor amputation                           |  |  | NA                                                 |  |
| Major amputation                           |  |  | NA                                                 |  |
| Total Death                                |  |  | NA                                                 |  |
| CV death                                   |  |  | NA                                                 |  |
| Cardiogenic shock                          |  |  | NA                                                 |  |
| Sudden cardiac death                       |  |  | NA                                                 |  |
| Fatal stroke                               |  |  | NA                                                 |  |
| Fatal MI                                   |  |  | NA                                                 |  |
| Non-fatal MI                               |  |  | NA                                                 |  |
| Non-fatal stroke                           |  |  | NA                                                 |  |
| CHF hospitalization                        |  |  | NA                                                 |  |
| New ESRD (in pts with no ESRD at baseline) |  |  | NA                                                 |  |
| TLR (PAD)                                  |  |  | No____<br>(ischemia-driven____<br>[symptoms____]); |  |

|                                     |  |  |                                                                                                                                                 |  |
|-------------------------------------|--|--|-------------------------------------------------------------------------------------------------------------------------------------------------|--|
|                                     |  |  | based on images____<br>[duplex____;<br>ABI____; CTA____;<br>MRA____;<br>DSA____]); Yes____                                                      |  |
| TVR (PAD)                           |  |  | No____<br>(ischemia-driven____<br>[symptoms____];<br>based on images____<br>[duplex____;<br>ABI____; CTA____;<br>MRA____;<br>DSA____]); Yes____ |  |
| TLR (CAD)                           |  |  | No____<br>(ischemia-driven____<br>[symptoms____;<br>stress test____];<br>based on images____<br>[CTA____;<br>MRA____;<br>cath____]); Yes____    |  |
| TVR (CAD)                           |  |  | No____<br>(ischemia-driven____<br>[symptoms____;<br>stress test____];<br>based on images____<br>[CTA____;<br>MRA____;<br>cath____]); Yes____    |  |
| Any<br>Revascularization<br>for PAD |  |  | No____<br>(ischemia-driven____<br>[symptoms____];<br>based on images____                                                                        |  |



|                                     |  |  |                                                                                                                                               |  |
|-------------------------------------|--|--|-----------------------------------------------------------------------------------------------------------------------------------------------|--|
|                                     |  |  | [duplex____;<br>ABI____; CTA____;<br>MRA____;<br>DSA____]); Yes____                                                                           |  |
| Any<br>revascularization<br>for CAD |  |  | No____<br>(ischemia-driven____<br>[symptoms____;<br>stress test____]);<br>based on images____<br>[CTA____;<br>MRA____;<br>cath____]); Yes____ |  |
| Recurrent angina                    |  |  | NA                                                                                                                                            |  |

Signature: \_\_\_\_\_ Date: \_\_\_\_\_

## Case Report Form of PIROUETTE-PTA Study (Visit 5)

**Mark** : Yes : "v" 、 No : "—" 、 Not done: "ND" 、 Not applicable : "NA"

**Fill up every item.**

Center ID: \_\_\_\_\_ Completion: Mandatory Date of form submission: \_\_\_\_\_

Patient ID: \_\_\_\_\_

Sex: \_\_\_\_\_ Age: \_\_\_\_\_ Time of Screening: \_\_\_\_\_

A. ABI : Lt \_\_\_\_\_ ; Rt \_\_\_\_\_ ; # Fontaine class \_\_\_\_\_ ; Rutherford class \_\_\_\_\_

B. Symptoms/signs : No \_\_\_\_\_ ; Yes \_\_\_\_\_ (intermittent claudication \_\_\_\_\_ ; leg swelling \_\_\_\_\_ ; cold foot \_\_\_\_\_ ; gangrene \_\_\_\_\_ ; poor healing wound (ulcer) \_\_\_\_\_ ; minor tissue loss \_\_\_\_\_ ; major tissue loss \_\_\_\_\_ ; others \_\_\_\_\_)

C. Drugs used: Bokey \_\_\_\_\_ ; Plavix \_\_\_\_\_ ; Ticagrelor \_\_\_\_\_ ; Ticocid \_\_\_\_\_ ;  
 Pletaal \_\_\_\_\_ ; Trental \_\_\_\_\_ ; Persantin \_\_\_\_\_ ; ACEI \_\_\_\_\_ ; ARB \_\_\_\_\_ ; DRI \_\_\_\_\_ ;  
 CCB \_\_\_\_\_ ( \_\_\_\_\_ ) ; Statin \_\_\_\_\_ ( \_\_\_\_\_ ) ; Fibrate \_\_\_\_\_ ( \_\_\_\_\_ ) ; TZD \_\_\_\_\_  
 ( \_\_\_\_\_ ) ; DPP4i \_\_\_\_\_ ( \_\_\_\_\_ ) ; GLP-1 \_\_\_\_\_ ( \_\_\_\_\_ ) ; others  
 (specified \_\_\_\_\_ )

D.

|              | Date of occurrence | Time elapse from Screening (days) | Is it planned staged PCI (or CABG) or PTA (or bypass) | Remarks |
|--------------|--------------------|-----------------------------------|-------------------------------------------------------|---------|
| Symptom-free |                    |                                   | NA                                                    |         |
| Intermittent |                    |                                   | NA                                                    |         |

Version: \_\_\_\_\_ ; Total pages: \_\_\_\_\_

CRF010(2015.01.05; Version3.0) Confidential

|                                            |  |  |                                                    |  |
|--------------------------------------------|--|--|----------------------------------------------------|--|
| claudication                               |  |  |                                                    |  |
| Resting pain or numbness                   |  |  | NA                                                 |  |
| Ulcer wound                                |  |  | NA                                                 |  |
| Gangrene                                   |  |  | NA                                                 |  |
| Minor amputation                           |  |  | NA                                                 |  |
| Major amputation                           |  |  | NA                                                 |  |
| Total Death                                |  |  | NA                                                 |  |
| CV death                                   |  |  | NA                                                 |  |
| Cardiogenic shock                          |  |  | NA                                                 |  |
| Sudden cardiac death                       |  |  | NA                                                 |  |
| Fatal stroke                               |  |  | NA                                                 |  |
| Fatal MI                                   |  |  | NA                                                 |  |
| Non-fatal MI                               |  |  | NA                                                 |  |
| Non-fatal stroke                           |  |  | NA                                                 |  |
| CHF hospitalization                        |  |  | NA                                                 |  |
| New ESRD (in pts with no ESRD at baseline) |  |  | NA                                                 |  |
| TLR (PAD)                                  |  |  | No____<br>(ischemia-driven____<br>[symptoms____]); |  |

|                                     |  |  |                                                                                                                                                 |  |
|-------------------------------------|--|--|-------------------------------------------------------------------------------------------------------------------------------------------------|--|
|                                     |  |  | based on images____<br>[duplex____;<br>ABI____; CTA____;<br>MRA____;<br>DSA____]); Yes____                                                      |  |
| TVR (PAD)                           |  |  | No____<br>(ischemia-driven____<br>[symptoms____];<br>based on images____<br>[duplex____;<br>ABI____; CTA____;<br>MRA____;<br>DSA____]); Yes____ |  |
| TLR (CAD)                           |  |  | No____<br>(ischemia-driven____<br>[symptoms____;<br>stress test____];<br>based on images____<br>[CTA____;<br>MRA____;<br>cath____]); Yes____    |  |
| TVR (CAD)                           |  |  | No____<br>(ischemia-driven____<br>[symptoms____;<br>stress test____];<br>based on images____<br>[CTA____;<br>MRA____;<br>cath____]); Yes____    |  |
| Any<br>Revascularization<br>for PAD |  |  | No____<br>(ischemia-driven____<br>[symptoms____];<br>based on images____                                                                        |  |

|                                     |  |  |                                                                                                                                               |  |
|-------------------------------------|--|--|-----------------------------------------------------------------------------------------------------------------------------------------------|--|
|                                     |  |  | [duplex____;<br>ABI____; CTA____;<br>MRA____;<br>DSA____]); Yes____                                                                           |  |
| Any<br>revascularization<br>for CAD |  |  | No____<br>(ischemia-driven____<br>[symptoms____;<br>stress test____]);<br>based on images____<br>[CTA____;<br>MRA____;<br>cath____]); Yes____ |  |
| Recurrent angina                    |  |  | NA                                                                                                                                            |  |

Signature: \_\_\_\_\_ Date: \_\_\_\_\_

## Case Report Form of PIROUETTE-PTA Study (Visit 6)

**Mark** : Yes : "v" 、 No : "—" 、 Not done: "ND" 、 Not applicable : "NA"

**Fill up every item.**

Center ID: \_\_\_\_\_ Completion: Mandatory Date of form submission: \_\_\_\_\_

Patient ID: \_\_\_\_\_

Sex: \_\_\_\_\_ Age: \_\_\_\_\_ Time of Screening: \_\_\_\_\_

A. ABI : Lt \_\_\_\_\_ ; Rt \_\_\_\_\_ ; # Fontaine class \_\_\_\_\_ ; Rutherford class \_\_\_\_\_

B. Symptoms/signs : No \_\_\_\_\_ ; Yes \_\_\_\_\_ (intermittent claudication \_\_\_\_\_ ; leg swelling \_\_\_\_\_ ; cold foot \_\_\_\_\_ ; gangrene \_\_\_\_\_ ; poor healing wound (ulcer) \_\_\_\_\_ ; minor tissue loss \_\_\_\_\_ ; major tissue loss \_\_\_\_\_ ; others \_\_\_\_\_)

C. Drugs used: Bokey \_\_\_\_\_ ; Plavix \_\_\_\_\_ ; Ticagrelor \_\_\_\_\_ ; Ticocid \_\_\_\_\_ ;  
 Pletaal \_\_\_\_\_ ; Trental \_\_\_\_\_ ; Persantin \_\_\_\_\_ ; ACEI \_\_\_\_\_ ; ARB \_\_\_\_\_ ; DRI \_\_\_\_\_ ;  
 CCB \_\_\_\_\_ ( \_\_\_\_\_ ) ; Statin \_\_\_\_\_ ( \_\_\_\_\_ ) ; Fibrate \_\_\_\_\_ ( \_\_\_\_\_ ) ; TZD \_\_\_\_\_  
 ( \_\_\_\_\_ ) ; DPP4i \_\_\_\_\_ ( \_\_\_\_\_ ) ; GLP-1 \_\_\_\_\_ ( \_\_\_\_\_ ) ; others  
 (specified \_\_\_\_\_ )

D.

|              | Date of occurrence | Time elapse from Screening (days) | Is it planned staged PCI (or CABG) or PTA (or bypass) | Remarks |
|--------------|--------------------|-----------------------------------|-------------------------------------------------------|---------|
| Symptom-free |                    |                                   | NA                                                    |         |
| Intermittent |                    |                                   | NA                                                    |         |

Version: \_\_\_\_\_ ; Total pages: \_\_\_\_\_

CRF011(2015.01.05; Version3.0) Confidential

|                                            |  |  |                                                    |  |
|--------------------------------------------|--|--|----------------------------------------------------|--|
| claudication                               |  |  |                                                    |  |
| Resting pain or numbness                   |  |  | NA                                                 |  |
| Ulcer wound                                |  |  | NA                                                 |  |
| Gangrene                                   |  |  | NA                                                 |  |
| Minor amputation                           |  |  | NA                                                 |  |
| Major amputation                           |  |  | NA                                                 |  |
| Total Death                                |  |  | NA                                                 |  |
| CV death                                   |  |  | NA                                                 |  |
| Cardiogenic shock                          |  |  | NA                                                 |  |
| Sudden cardiac death                       |  |  | NA                                                 |  |
| Fatal stroke                               |  |  | NA                                                 |  |
| Fatal MI                                   |  |  | NA                                                 |  |
| Non-fatal MI                               |  |  | NA                                                 |  |
| Non-fatal stroke                           |  |  | NA                                                 |  |
| CHF hospitalization                        |  |  | NA                                                 |  |
| New ESRD (in pts with no ESRD at baseline) |  |  | NA                                                 |  |
| TLR (PAD)                                  |  |  | No____<br>(ischemia-driven____<br>[symptoms____]); |  |

|                                     |  |  |                                                                                                                                                 |  |
|-------------------------------------|--|--|-------------------------------------------------------------------------------------------------------------------------------------------------|--|
|                                     |  |  | based on images____<br>[duplex____;<br>ABI____; CTA____;<br>MRA____;<br>DSA____]); Yes____                                                      |  |
| TVR (PAD)                           |  |  | No____<br>(ischemia-driven____<br>[symptoms____];<br>based on images____<br>[duplex____;<br>ABI____; CTA____;<br>MRA____;<br>DSA____]); Yes____ |  |
| TLR (CAD)                           |  |  | No____<br>(ischemia-driven____<br>[symptoms____;<br>stress test____];<br>based on images____<br>[CTA____;<br>MRA____;<br>cath____]); Yes____    |  |
| TVR (CAD)                           |  |  | No____<br>(ischemia-driven____<br>[symptoms____;<br>stress test____];<br>based on images____<br>[CTA____;<br>MRA____;<br>cath____]); Yes____    |  |
| Any<br>Revascularization<br>for PAD |  |  | No____<br>(ischemia-driven____<br>[symptoms____];<br>based on images____                                                                        |  |



|                                     |  |  |                                                                                                                                               |  |
|-------------------------------------|--|--|-----------------------------------------------------------------------------------------------------------------------------------------------|--|
|                                     |  |  | [duplex____;<br>ABI____; CTA____;<br>MRA____;<br>DSA____]); Yes____                                                                           |  |
| Any<br>revascularization<br>for CAD |  |  | No____<br>(ischemia-driven____<br>[symptoms____;<br>stress test____]);<br>based on images____<br>[CTA____;<br>MRA____;<br>cath____]); Yes____ |  |
| Recurrent angina                    |  |  | NA                                                                                                                                            |  |

Signature: \_\_\_\_\_ Date: \_\_\_\_\_

## Case Report Form of PIROUETTE-PTA Study (Visit 7)

**Mark** : Yes : "v" 、 No : "—" 、 Not done: "ND" 、 Not applicable : "NA"

**Fill up every item.**

Center ID: \_\_\_\_\_ Completion: Mandatory Date of form submission: \_\_\_\_\_

Patient ID: \_\_\_\_\_

Sex: \_\_\_\_\_ Age: \_\_\_\_\_ Time of Screening: \_\_\_\_\_

A. ABI : Lt \_\_\_\_\_ ; Rt \_\_\_\_\_ ; # Fontaine class \_\_\_\_\_ ; Rutherford class \_\_\_\_\_

B. Symptoms/signs : No \_\_\_\_\_ ; Yes \_\_\_\_\_ (intermittent claudication \_\_\_\_\_ ; leg swelling \_\_\_\_\_ ; cold foot \_\_\_\_\_ ; gangrene \_\_\_\_\_ ; poor healing wound (ulcer) \_\_\_\_\_ ; minor tissue loss \_\_\_\_\_ ; major tissue loss \_\_\_\_\_ ; others \_\_\_\_\_)

C. Drugs used: Bokey \_\_\_\_\_ ; Plavix \_\_\_\_\_ ; Ticagrelor \_\_\_\_\_ ; Ticocid \_\_\_\_\_ ;  
 Pletaal \_\_\_\_\_ ; Trental \_\_\_\_\_ ; Persantin \_\_\_\_\_ ; ACEI \_\_\_\_\_ ; ARB \_\_\_\_\_ ; DRI \_\_\_\_\_ ;  
 CCB \_\_\_\_\_ ( \_\_\_\_\_ ) ; Statin \_\_\_\_\_ ( \_\_\_\_\_ ) ; Fibrate \_\_\_\_\_ ( \_\_\_\_\_ ) ; TZD \_\_\_\_\_  
 ( \_\_\_\_\_ ) ; DPP4i \_\_\_\_\_ ( \_\_\_\_\_ ) ; GLP-1 \_\_\_\_\_ ( \_\_\_\_\_ ) ; others  
 (specified \_\_\_\_\_ )

D.

|              | Date of occurrence | Time elapse from Screening (days) | Is it planned staged PCI (or CABG) or PTA (or bypass) | Remarks |
|--------------|--------------------|-----------------------------------|-------------------------------------------------------|---------|
| Symptom-free |                    |                                   | NA                                                    |         |
| Intermittent |                    |                                   | NA                                                    |         |

Version: \_\_\_\_\_ ; Total pages: \_\_\_\_\_

CRF012(2015.01.05; Version3.0) Confidential

|                                            |  |  |                                                    |  |
|--------------------------------------------|--|--|----------------------------------------------------|--|
| claudication                               |  |  |                                                    |  |
| Resting pain or numbness                   |  |  | NA                                                 |  |
| Ulcer wound                                |  |  | NA                                                 |  |
| Gangrene                                   |  |  | NA                                                 |  |
| Minor amputation                           |  |  | NA                                                 |  |
| Major amputation                           |  |  | NA                                                 |  |
| Total Death                                |  |  | NA                                                 |  |
| CV death                                   |  |  | NA                                                 |  |
| Cardiogenic shock                          |  |  | NA                                                 |  |
| Sudden cardiac death                       |  |  | NA                                                 |  |
| Fatal stroke                               |  |  | NA                                                 |  |
| Fatal MI                                   |  |  | NA                                                 |  |
| Non-fatal MI                               |  |  | NA                                                 |  |
| Non-fatal stroke                           |  |  | NA                                                 |  |
| CHF hospitalization                        |  |  | NA                                                 |  |
| New ESRD (in pts with no ESRD at baseline) |  |  | NA                                                 |  |
| TLR (PAD)                                  |  |  | No____<br>(ischemia-driven____<br>[symptoms____]); |  |

|                                     |  |  |                                                                                                                                                 |  |
|-------------------------------------|--|--|-------------------------------------------------------------------------------------------------------------------------------------------------|--|
|                                     |  |  | based on images____<br>[duplex____;<br>ABI____; CTA____;<br>MRA____;<br>DSA____]); Yes____                                                      |  |
| TVR (PAD)                           |  |  | No____<br>(ischemia-driven____<br>[symptoms____];<br>based on images____<br>[duplex____;<br>ABI____; CTA____;<br>MRA____;<br>DSA____]); Yes____ |  |
| TLR (CAD)                           |  |  | No____<br>(ischemia-driven____<br>[symptoms____;<br>stress test____];<br>based on images____<br>[CTA____;<br>MRA____;<br>cath____]); Yes____    |  |
| TVR (CAD)                           |  |  | No____<br>(ischemia-driven____<br>[symptoms____;<br>stress test____];<br>based on images____<br>[CTA____;<br>MRA____;<br>cath____]); Yes____    |  |
| Any<br>Revascularization<br>for PAD |  |  | No____<br>(ischemia-driven____<br>[symptoms____];<br>based on images____                                                                        |  |

|                                     |  |  |                                                                                                                                               |  |
|-------------------------------------|--|--|-----------------------------------------------------------------------------------------------------------------------------------------------|--|
|                                     |  |  | [duplex____;<br>ABI____; CTA____;<br>MRA____;<br>DSA____]); Yes____                                                                           |  |
| Any<br>revascularization<br>for CAD |  |  | No____<br>(ischemia-driven____<br>[symptoms____;<br>stress test____]);<br>based on images____<br>[CTA____;<br>MRA____;<br>cath____]); Yes____ |  |
| Recurrent angina                    |  |  | NA                                                                                                                                            |  |

Signature: \_\_\_\_\_ Date: \_\_\_\_\_

## Case Report Form of PIROUETTE-PTA Study (Visit 8)

**Mark** : Yes : "v" 、 No : "—" 、 Not done: "ND" 、 Not applicable : "NA"

**Fill up every item.**

Center ID: \_\_\_\_\_ Completion: Mandatory Date of form submission: \_\_\_\_\_

Patient ID: \_\_\_\_\_

Sex: \_\_\_\_\_ Age: \_\_\_\_\_ Time of Screening: \_\_\_\_\_

A. ABI : Lt \_\_\_\_\_ ; Rt \_\_\_\_\_ ; # Fontaine class \_\_\_\_\_ ; Rutherford class \_\_\_\_\_

B. Symptoms/signs : No \_\_\_\_\_ ; Yes \_\_\_\_\_ (intermittent claudication \_\_\_\_\_ ; leg swelling \_\_\_\_\_ ; cold foot \_\_\_\_\_ ; gangrene \_\_\_\_\_ ; poor healing wound (ulcer) \_\_\_\_\_ ; minor tissue loss \_\_\_\_\_ ; major tissue loss \_\_\_\_\_ ; others \_\_\_\_\_)

C. Drugs used: Bokey \_\_\_\_\_ ; Plavix \_\_\_\_\_ ; Ticagrelor \_\_\_\_\_ ; Ticocid \_\_\_\_\_ ;  
 Pletaal \_\_\_\_\_ ; Trental \_\_\_\_\_ ; Persantin \_\_\_\_\_ ; ACEI \_\_\_\_\_ ; ARB \_\_\_\_\_ ; DRI \_\_\_\_\_ ;  
 CCB \_\_\_\_\_ ( \_\_\_\_\_ ) ; Statin \_\_\_\_\_ ( \_\_\_\_\_ ) ; Fibrate \_\_\_\_\_ ( \_\_\_\_\_ ) ; TZD \_\_\_\_\_  
 ( \_\_\_\_\_ ) ; DPP4i \_\_\_\_\_ ( \_\_\_\_\_ ) ; GLP-1 \_\_\_\_\_ ( \_\_\_\_\_ ) ; others  
 (specified \_\_\_\_\_ )

D.

|              | Date of occurrence | Time elapse from Screening (days) | Is it planned staged PCI (or CABG) or PTA (or bypass) | Remarks |
|--------------|--------------------|-----------------------------------|-------------------------------------------------------|---------|
| Symptom-free |                    |                                   | NA                                                    |         |
| Intermittent |                    |                                   | NA                                                    |         |

Version: \_\_\_\_\_ ; Total pages: \_\_\_\_\_

CRF013(2015.01.05; Version3.0) Confidential

|                                            |  |  |                                                    |  |
|--------------------------------------------|--|--|----------------------------------------------------|--|
| claudication                               |  |  |                                                    |  |
| Resting pain or numbness                   |  |  | NA                                                 |  |
| Ulcer wound                                |  |  | NA                                                 |  |
| Gangrene                                   |  |  | NA                                                 |  |
| Minor amputation                           |  |  | NA                                                 |  |
| Major amputation                           |  |  | NA                                                 |  |
| Total Death                                |  |  | NA                                                 |  |
| CV death                                   |  |  | NA                                                 |  |
| Cardiogenic shock                          |  |  | NA                                                 |  |
| Sudden cardiac death                       |  |  | NA                                                 |  |
| Fatal stroke                               |  |  | NA                                                 |  |
| Fatal MI                                   |  |  | NA                                                 |  |
| Non-fatal MI                               |  |  | NA                                                 |  |
| Non-fatal stroke                           |  |  | NA                                                 |  |
| CHF hospitalization                        |  |  | NA                                                 |  |
| New ESRD (in pts with no ESRD at baseline) |  |  | NA                                                 |  |
| TLR (PAD)                                  |  |  | No____<br>(ischemia-driven____<br>[symptoms____]); |  |

|                                     |  |  |                                                                                                                                                 |  |
|-------------------------------------|--|--|-------------------------------------------------------------------------------------------------------------------------------------------------|--|
|                                     |  |  | based on images____<br>[duplex____;<br>ABI____; CTA____;<br>MRA____;<br>DSA____]); Yes____                                                      |  |
| TVR (PAD)                           |  |  | No____<br>(ischemia-driven____<br>[symptoms____];<br>based on images____<br>[duplex____;<br>ABI____; CTA____;<br>MRA____;<br>DSA____]); Yes____ |  |
| TLR (CAD)                           |  |  | No____<br>(ischemia-driven____<br>[symptoms____;<br>stress test____];<br>based on images____<br>[CTA____;<br>MRA____;<br>cath____]); Yes____    |  |
| TVR (CAD)                           |  |  | No____<br>(ischemia-driven____<br>[symptoms____;<br>stress test____];<br>based on images____<br>[CTA____;<br>MRA____;<br>cath____]); Yes____    |  |
| Any<br>Revascularization<br>for PAD |  |  | No____<br>(ischemia-driven____<br>[symptoms____];<br>based on images____                                                                        |  |



|                                     |  |  |                                                                                                                                               |  |
|-------------------------------------|--|--|-----------------------------------------------------------------------------------------------------------------------------------------------|--|
|                                     |  |  | [duplex____;<br>ABI____; CTA____;<br>MRA____;<br>DSA____]); Yes____                                                                           |  |
| Any<br>revascularization<br>for CAD |  |  | No____<br>(ischemia-driven____<br>[symptoms____;<br>stress test____]);<br>based on images____<br>[CTA____;<br>MRA____;<br>cath____]); Yes____ |  |
| Recurrent angina                    |  |  | NA                                                                                                                                            |  |

Signature: \_\_\_\_\_ Date: \_\_\_\_\_
